# Supplementary material for: Neurons Export Extracellular Vesicles Enriched in Cysteine String Protein and Misfolded Protein Cargo
Source: PubMed Central journal article supplement (PMC5430488; doi:10.1038/s41598-017-01115-6), 2017-04-19
Supplement: 41598_2017_1115_MOESM1_ESM.pdf [file 41598_2017_1115_MOESM1_ESM.pdf]

Neurons Export Extracellular Vesicles Enriched in Cysteine String Protein and Misfolded Protein Cargo

*Jingtí Deng, Carolina Koutras, Julien Donnelier, Mana Alshehri, Maryam Fotouhi, Martine Girard, Steve Casha, Peter S. McPherson, Stephen M. Robbins, Janice E. A. Braun*

### **Supplementary Table 1. Antibodies used in this Study**

|                                 |                              |
|---------------------------------|------------------------------|
| Anti CSP polyclonal             | (Braun and Scheller, 1995)   |
| Anti-myc monoclonal             | Clonotech laboratories Inc.  |
| Anti-FLAG monoclonal            | Clonotech laboratories Inc.  |
| Anti-actin monoclonal           | Sigma-Aldrich                |
| Anti-Hsp70/Hsc70 monoclonal     | Sigma-Aldrich                |
| Anti-clathrin monoclonal        | BD Transduction Labs         |
| Anti-flotillin-1 monoclonal     | BD Transduction Labs         |
| Anti-Hsp90 polyclonal           | StressMarq Biosciences       |
| Anti-DnaJB1 polyclonal          | Thermo Fisher Scientific     |
| Anti-DnaJB11 polyclonal         | Cedarlane                    |
| Anti-DnaJA1 monoclonal          | Cedarlane                    |
| Anti-G <sub>αs</sub> polyclonal | Santa Cruz Biotechnology     |
| Anti-SNAP25 monoclonal          | Sternberger Monoclonals Inc. |
| Anti-BK monoclonal              | BD Transduction Labs         |
| Anti syntaxin monoclonal        | Sigma-Aldrich                |
| Anti-synaptotagmin polyclonal   | Sigma-Aldrich                |
| Anti-dynamin monoclonal         | BD Transduction Labs         |
| Anti-GFP polyclonal             | Santa Cruz Biotechnology     |
| Anti-ILK monoclonal             | Ab Frontier                  |
| Anti-SOD1 polyclonal            | Enzo                         |
| Anti-huntingtin monoclonal      | Millipore                    |
